# Supplementary material for: The Metallophosphoesterase-Domain-Containing Protein 2 (MPPED2) Gene Acts as Tumor Suppressor in Breast Cancer
Source: PubMed Central journal article supplement (PMC6627064; doi:10.3390/cancers11060797), 2019-06-08
Supplement: cancers-11-00797-s001.pdf [file cancers-11-00797-s001.pdf]

# Supplementary Materials: The Metallophosphoesterase-Domain-Containing Protein 2 (MPPED2) Gene Acts as Tumor Suppressor in Breast Cancer

Simona Pellecchia, Romina Sepe, Antonella Federico, Mariella Cuomo, Sara Carmela Credendino, Pasquale Pisapia, Claudio Bellevicine, Pedro Nicolau-Neto, Mariana Severo, Elvira Crescenzi, Gabriella De Vita, Luigi Maria Terracciano, Lorenzo Chiariotti, Alfredo Fusco and Pierlorenzo Pallante

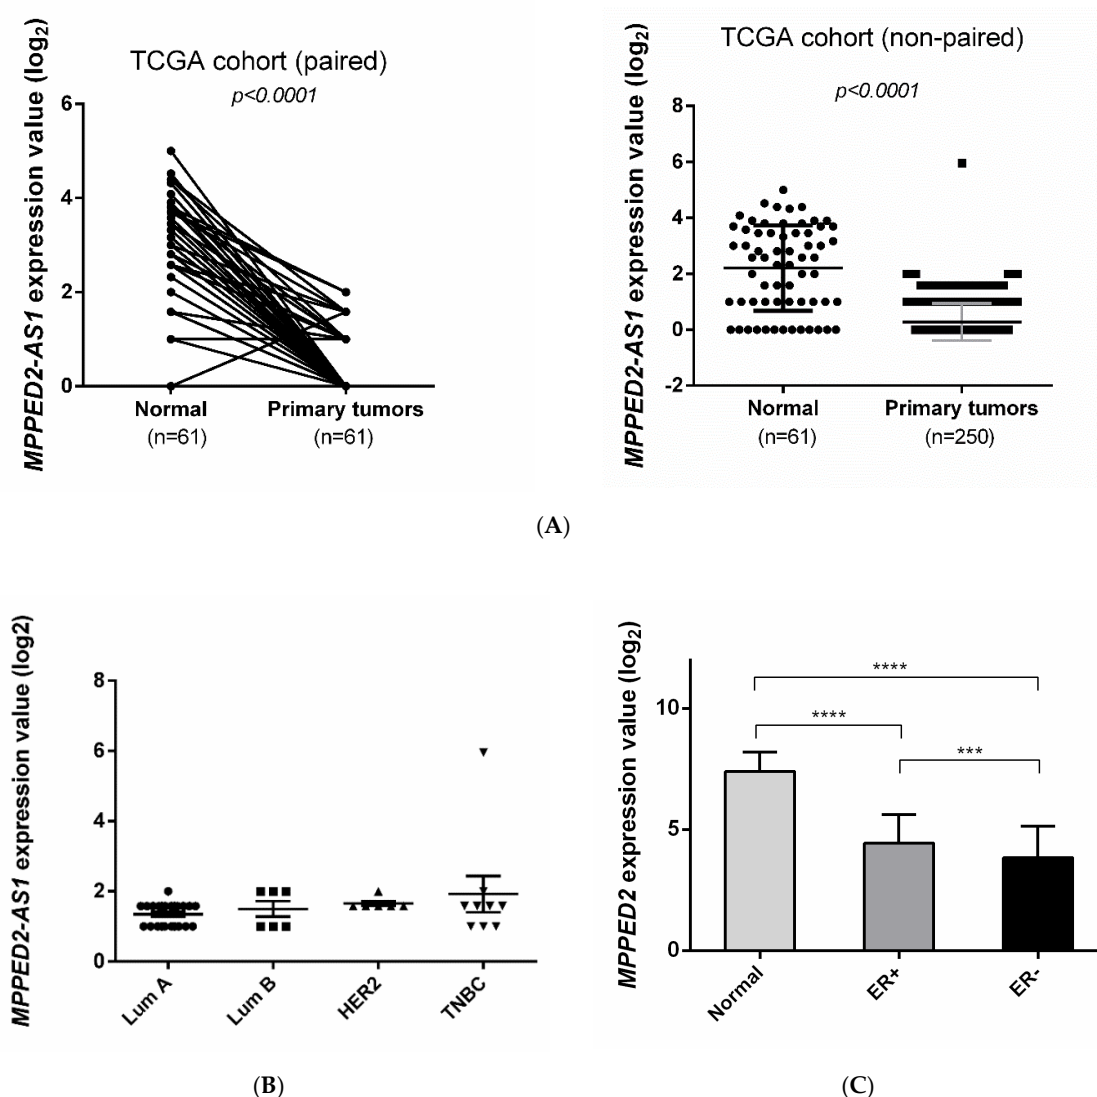

**Figure S1.** Analysis of *MPPED2* and *MPPED2-AS1* expression in The Cancer Genome Atlas (TCGA) dataset. (A) *MPPED2-AS1* expression levels were evaluated in TCGA dataset. Paired (left panel) and non-paired (right panel) breast cancer samples were evaluated. *t*-test: \*\*\*\*,  $p < 0.0001$  (primary tumors vs. normal tissues in both paired and non-paired samples). (B) *MPPED2-AS1* expression levels were evaluated in the molecular subtypes (Lum A,  $n = 23$ ; Lum B,  $n = 6$ ; HER2,  $n = 6$ ; TNBC,  $n = 9$ ) of the TCGA dataset. No statistical significance was observed among the groups (one-way analysis of variance (ANOVA),  $p = 0.29$ ). (C) *MPPED2* expression levels were evaluated in TCGA dataset. ER+ ( $n$

= 172), ER- ( $n = 88$ ) and normal ( $n = 61$ ) breast samples were evaluated. One-way ANOVA: \*\*\*\*,  $p < 0.0001$  (ER+ vs. normal and ER- vs. normal); \*\*\*,  $p < 0.001$  (ER+ vs. ER-).

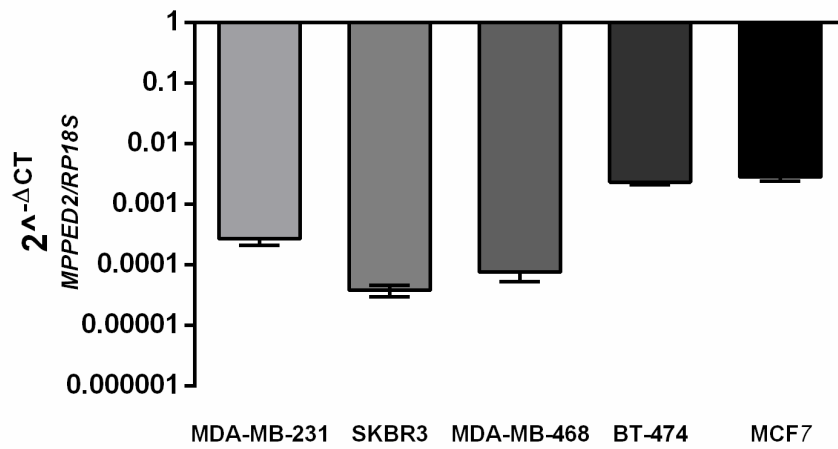

**Figure 2.** Expression analysis of *MPPED2* in human breast carcinoma cell lines. quantitative real-time polymerase chain reaction (qRT-PCR) analysis of *MPPED2* mRNA levels in a panel of human breast carcinoma cell lines, including MDA-MB-231, SKBR3, MDA-MB-468, BT-474 and MCF7. Data are reported as  $2^{-\Delta Ct}$  values  $\pm$ SD.

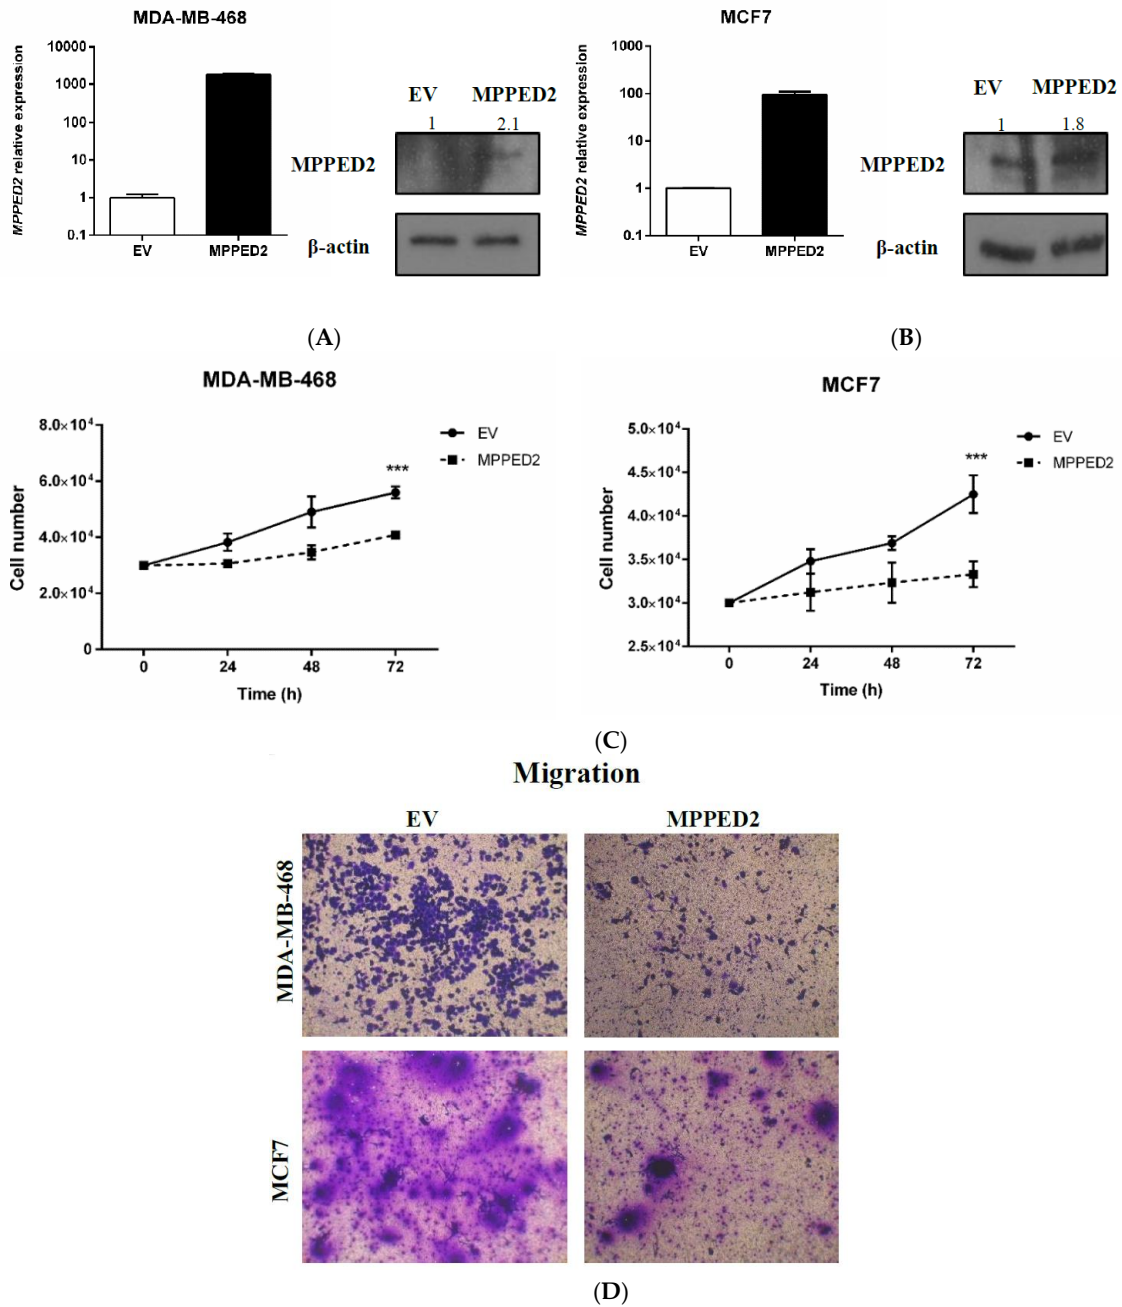

**Figure S3.** *MPPED2* reduces proliferation and migration of breast carcinoma cell lines. **(A,B)** qRT-PCR performed in MDA-MB-468 and MCF7 cell lines transiently transfected with *MPPED2* or carrying the corresponding empty vector (EV) (left panel). Data are reported as  $2^{-\Delta\Delta C_t}$  values  $\pm$ SD, compared to the EV, set equal to 1. Western blot analysis confirming the expression of *MPPED2* (right panel).  $\beta$ -actin was used to normalize the amount of loaded protein. Densitometric analysis was performed by using ImageJ software to evaluate *MPPED2* overexpression compared to EV, set equal to 1. **(C)** Cell growth analysis was performed in MDA-MB-468 (left panel) and MCF7 (right panel) cells transiently expressing *MPPED2* or carrying the corresponding empty vector (EV). Cell number was evaluated at 24 h, 48 h and 72 h after seeding. Values were obtained from three independent experiments. Data were reported as mean  $\pm$ SD. Two-way ANOVA test (Bonferroni post-test: *MPPED2* vs. EV, 72h, \*\*\*,  $p < 0.001$ ) **(D)** Representative images of migration assays performed in MDA-MB-468 and MCF7 cells transiently transfected with *MPPED2* or the corresponding empty vector (EV). Magnification 40 $\times$ .

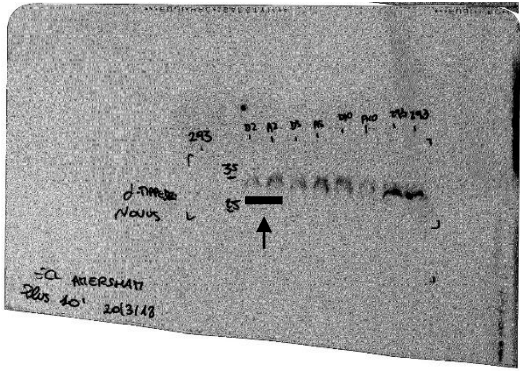

(A)

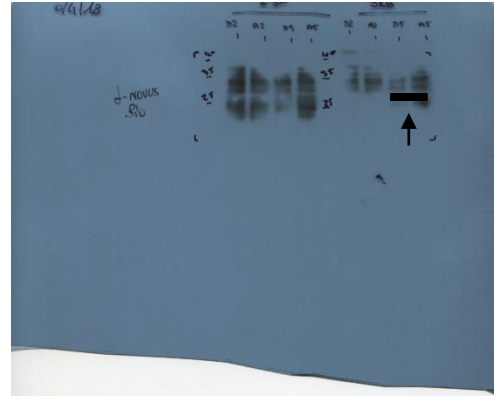

(B)

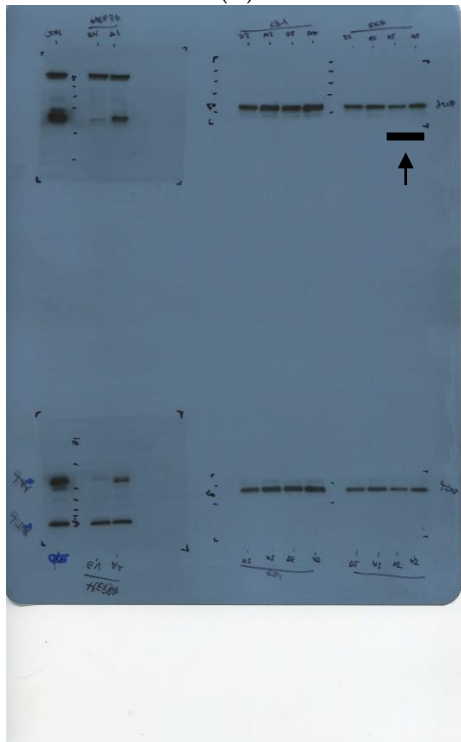

(C)

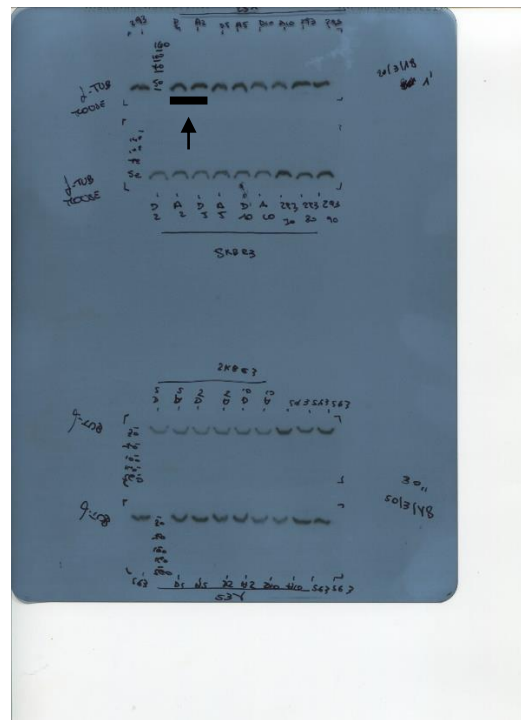

(D)

**Figure S4.** Supplementary Materials for Western blot to Figure 3: (A) Figure 3F MPPED2, (B) Figure 3G MPPED2, (C) Figure 3G  $\alpha$ -tubulin (D) Figure 3F  $\alpha$ -tubulin.

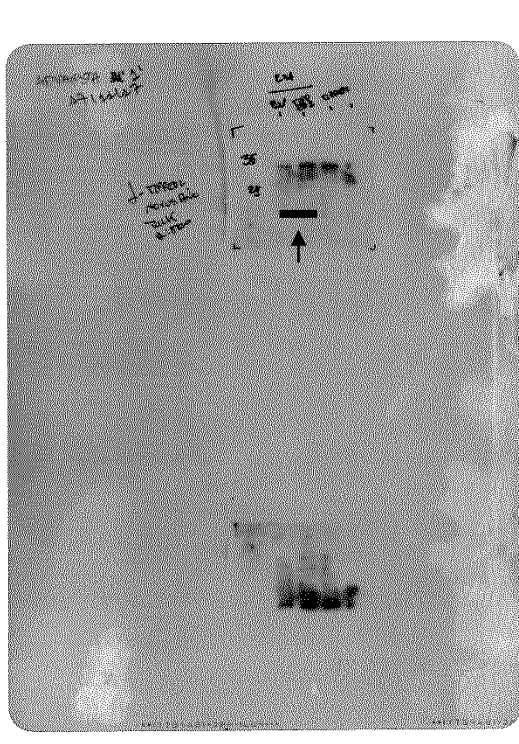

(A)

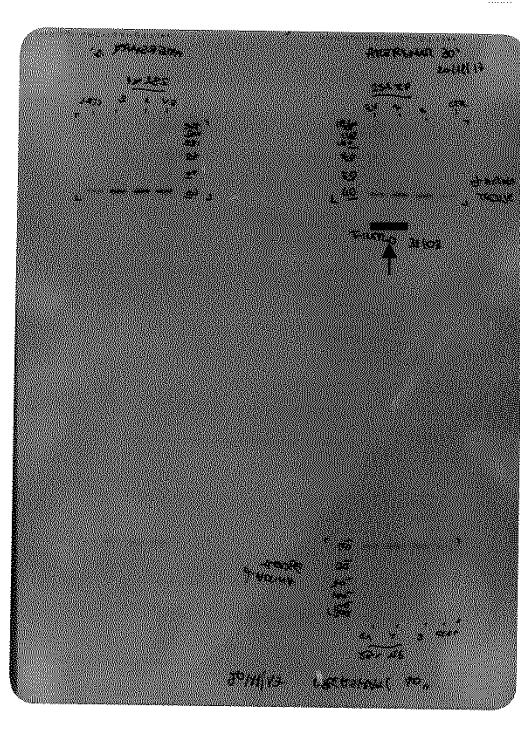

(B)

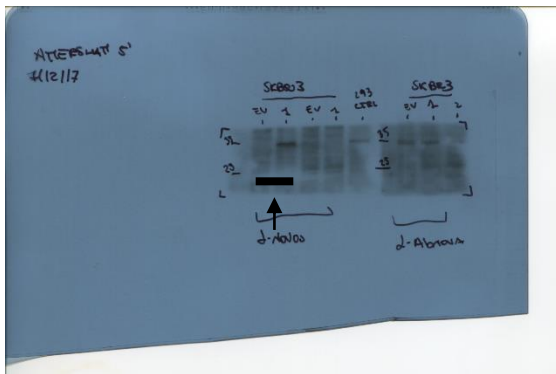

(C)

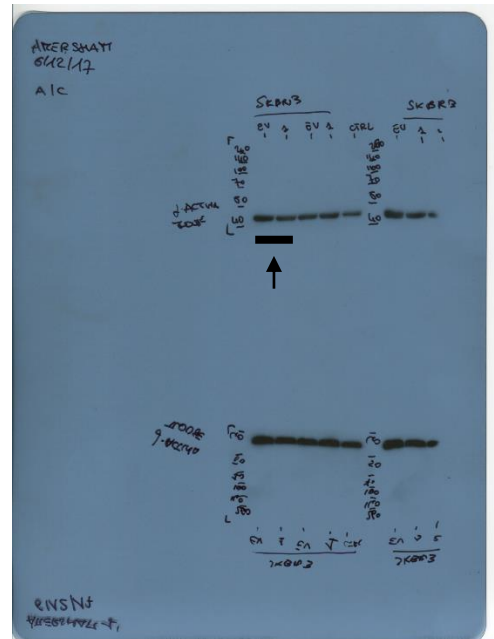

(D)

**Figure S5.** Supplementary Materials for Western blot to Figure 5: (A) Figure 5A MPPED2, (B) Figure 5A  $\beta$ -actin, (C) Figure 5B MPPED2, (D) Figure 5B  $\beta$ -actin.

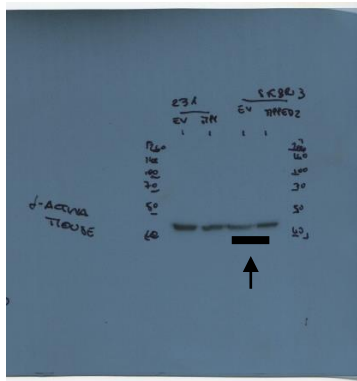

(A)

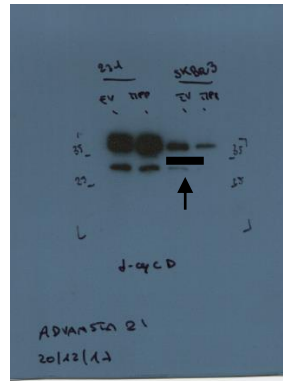

(B)

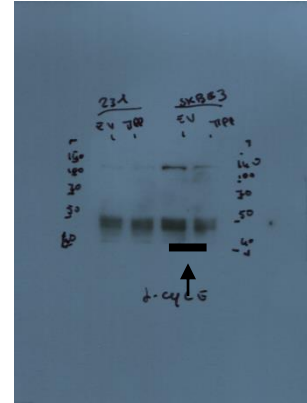

(C)

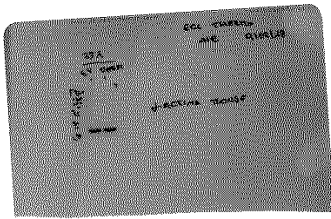

(D)

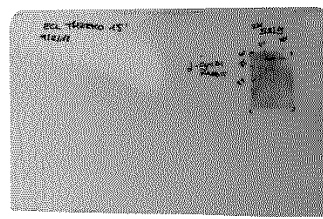

(E)

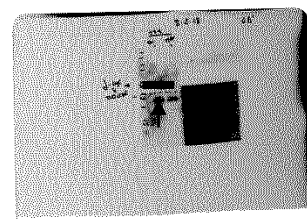

(F)

**Figure S6.** Supplementary Materials for Western blot to Figure 6: (A) Figure 6C SKBR3  $\beta$ -actin, (B) Figure 6C SKBR3 Cyclin D, (C) Figure 6C Cyclin E, (D) Figure 6C MDA-MB-231  $\beta$ -actin, (E) Figure 6C MDA-MB-231 Cyclin D, (F) Figure 6C MDA-MB-231 Cyclin E.

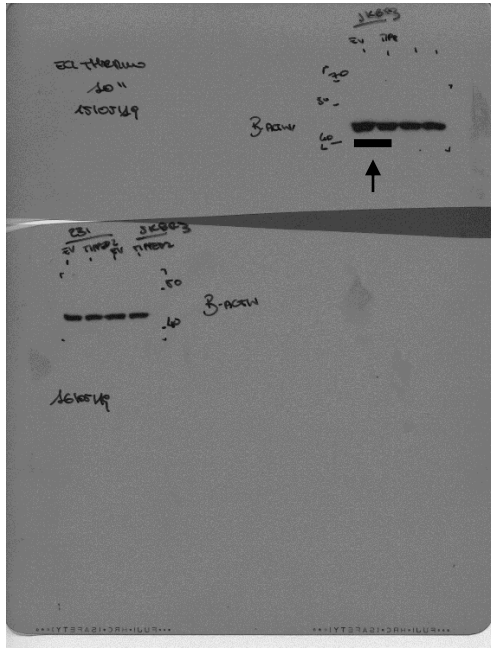

(A)

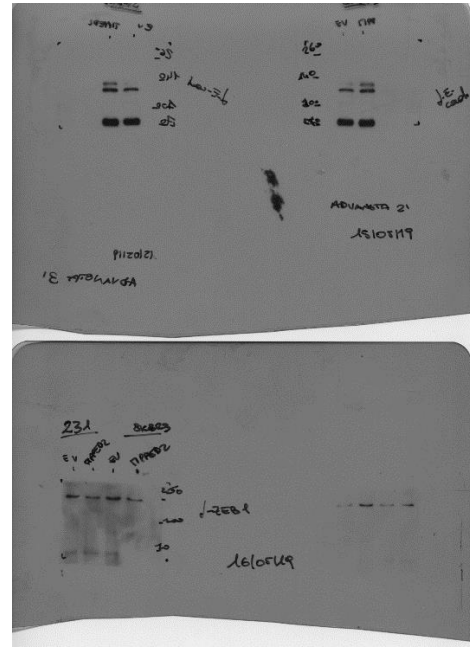

(B)

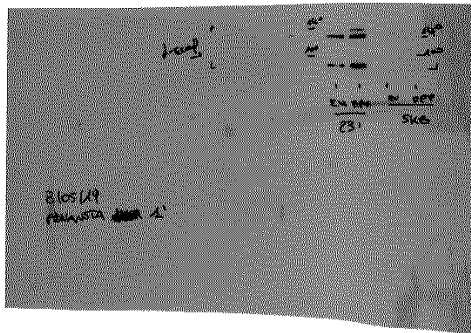

(C)

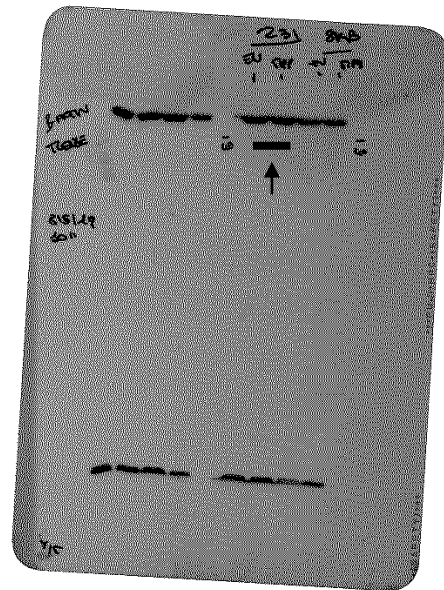

(D)

**Figure S7.** Supplementary Materials for Western blot to Figure 7: (A) Figure 7C SKBR3,  $\beta$ -actin, MDA-MB-231-SKBR3,  $\beta$ -actin, (B) Figure 7C SKBR3, E-cadherin, MDA-MB-231, SKBR3, ZEB1, (C) Figure 7C MDA-MB231, E-cadherin, (D) Figure 7C MDA-MB-231,  $\beta$ -actin.

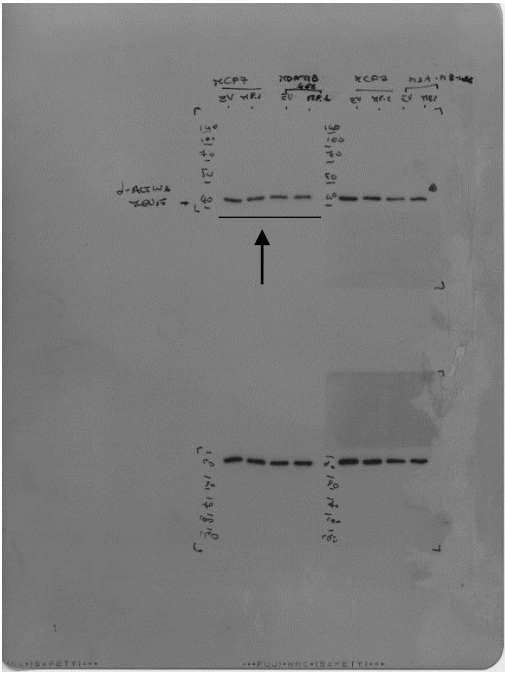

(A)

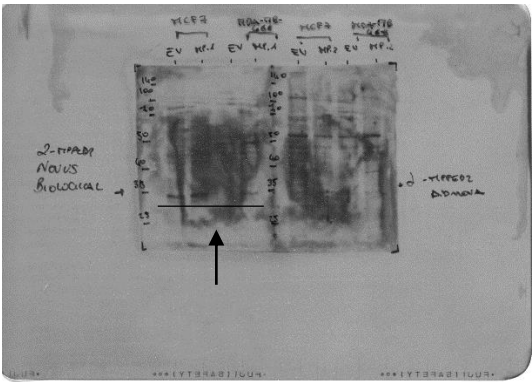

(B)

**Figure S8.** Supplementary Materials for Western blot to Figure S3: (A) Figure S3A and S3B,  $\beta$ -actin, (B) Figure S3A and S3B, MPPED2.



**Table S1.** Association of MPPED2 expression and tissue microarray (TMA) breast cancer characteristic.

| Characteristic                       | n         | MPPED2 Staining  |                    | p-Value* |
|--------------------------------------|-----------|------------------|--------------------|----------|
|                                      |           | Low (0,1+) n (%) | High (2+,3+) n (%) |          |
| <i>Age</i>                           |           |                  |                    |          |
| <50                                  | 22        | 12 (31.6)        | 10 (26.3)          | 0.0002   |
| ≥50                                  | 16        | 1 (2.6)          | 15 (39.5)          |          |
| <i>Tumor size</i>                    |           |                  |                    |          |
| ≤3 cm                                | 16        | 5 (13.2)         | 12 (31.6)          | 0.734    |
| >3 cm                                | 22        | 8 (21)           | 13 (34.2)          |          |
| <i>Nottingham histological grade</i> |           |                  |                    |          |
| I                                    | 0         |                  |                    | 0.968    |
| II                                   | 16        | 6 (15.8)         | 10 (26.3)          |          |
| III                                  | 19        | 7 (18.4)         | 12 (31.6)          |          |
| NA                                   | 3         |                  | 3 (7.9)            |          |
| <i>Lymph node</i>                    |           |                  |                    |          |
| Negative                             | 13        | 3 (7.9)          | 10 (26.3)          | 0.473    |
| Positive                             | 25        | 10 (26.3)        | 15 (39.5)          |          |
| <i>Estrogen receptor</i>             |           |                  |                    |          |
| Negative                             | 27        | 11 (28.9)        | 16 (42.1)          | 0.267    |
| Positive                             | 11        | 2 (5.3)          | 9 (23.7)           |          |
| <i>Progesterone receptor</i>         |           |                  |                    |          |
| Negative                             | 28        | 11 (29)          | 17 (44.7)          | 0.441    |
| Positive                             | 10        | 2 (5.3)          | 8 (21)             |          |
| <i>Her2</i>                          |           |                  |                    |          |
| Negative                             | 28        | 9 (23.7)         | 19 (50)            | 0.709    |
| Positive                             | 10        | 4 (10.5)         | 6 (15.8)           |          |
| <i>Tumor stage</i>                   |           |                  |                    |          |
| I                                    | 0         |                  |                    | 0.295    |
| II                                   | 23        | 6 (15.8)         | 17 (44.7)          |          |
| III                                  | 15        | 7 (18.4)         | 8 (21)             |          |
| <b>Total</b>                         | <b>38</b> |                  |                    |          |

\* Fisher's exact test: samples were grouped in low (0, 1+) and high (2+, 3+) expressors, based on the intensity of the staining. NA, not available.

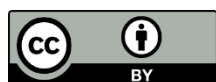

© 2019 by the authors. Submitted for possible open access publication under the terms and conditions of the Creative Commons Attribution (CC BY) license (<http://creativecommons.org/licenses/by/4.0/>).
